# Supplementary material for: Galactomannan Downregulates the Inflammation Responses in Human Macrophages via NFκB2/p100
Source: Hindawi journal article supplement (doi:10.1155/2015/942517), 2015-01-01
Supplement: f1 [file 942517.f1.pdf]

## Supplementary Appendix

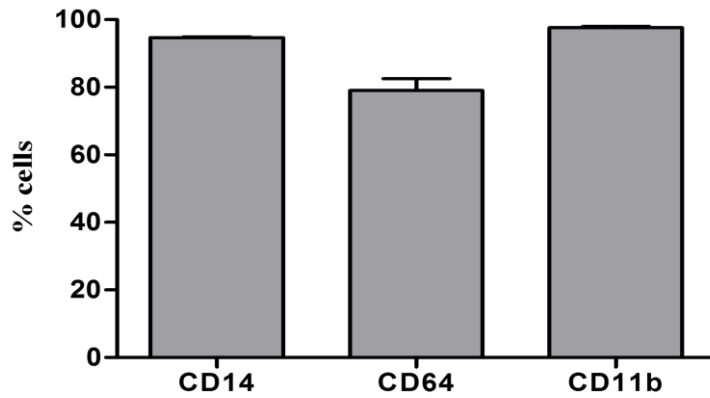

Supplementary Figure 1. Characterization of human macrophages and purity.

Human monocytes isolated and cultured with 50 ng/ml M-CSF for 10 days.

Differentiated human macrophages were stained with anti-CD14, anti-CD64 and anti-

CD11b. A, Percentage of CD14, CD11b and CD64 on CD14 gated cells are shown.

(n=5).

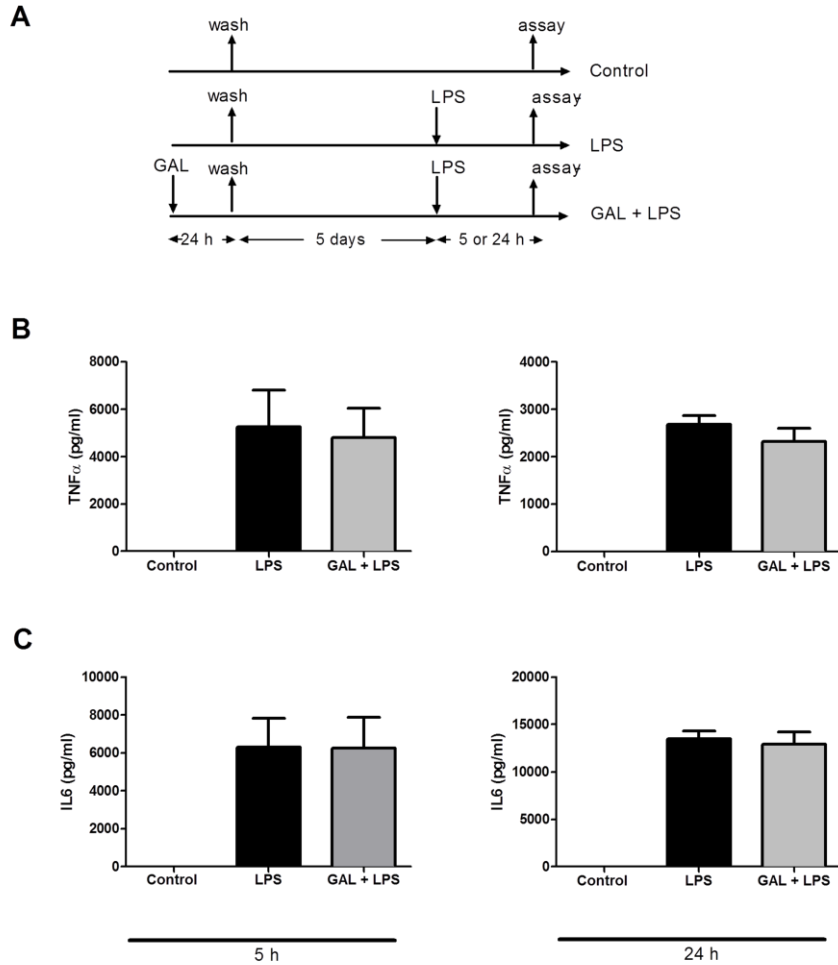

Supplementary Figure 2. GAL effects after 5 days.

A, Schematic representation of the inflammation cytokines over 5 days of the GAL model used for this study. The cultures of human macrophages were treated with 10 $\mu$ g/ml GAL for 24h, washed twice and then rested for 5 days. Cultured cells were challenged with 10 ng/ml of LPS for 5 or 24h. Controls were challenged or not with 10 ng/ml of LPS. Supernatants were harvested at the indicated times and TNF $\alpha$  (B), IL6 (C) proteins levels were evaluated by CBA; (n=4).
